# Supplementary material for: Defective Mitochondrial Quality Control during Dengue Infection Contributes to Disease Pathogenesis
Source: PubMed Central journal article supplement (PMC9599662; doi:10.1128/jvi.00828-22), 2022-10-05

# 1 **Supplementary Information**

## 2 **Supplementary Methods**

3 **Total RNA extraction and gene expression analysis:** The total cellular RNA extraction from  
4 mock- and infected cells was performed using the Trizol (Invitrogen, USA) method as per the  
5 manufacturer's protocol. The Nanodrop Spectrophotometer was used to evaluate the quality  
6 and amount of RNA. Takara Primescript™ 1st strand cDNA synthesis kit (6110A) with Oligo  
7 dT primers was used to synthesise cDNA from 2 ug of total RNA. Gene expression analysis  
8 was performed with PowerUp™ SYBR™ Green Master Mix (A25741) in Applied Biosystems  
9 Quant Studio 6 using the gene-specific primers provided in **S1 Table**.

10

11 **Western blot Analysis:** Mock or dengue-infected cells were collected and lysed in RIPA  
12 buffer supplemented with a cocktail of protease and phosphatase inhibitors. Lysates were  
13 briefly sonicated and centrifuged at 13,000 rpm for 20 minutes at 4°C to obtain the clear whole  
14 cell lysates. Protein concentration was estimated using the Pierce BCA Protein Assay kit. An  
15 equal amount of protein obtained from various samples was subjected to SDS-PAGE and  
16 Western blot. The blot membranes were blocked with 3% BSA blocking buffer, followed by  
17 overnight incubation with respective primary antibody and corresponding HRP-conjugated  
18 secondary antibody (1:5000 dilution, Promega) for one hour at room temperature. Blots were  
19 developed using the Clarity Western ECL substrate (Bio-Rad) and images were acquired with  
20 the Chemi-Doc MP Imaging System (Bio-Rad). All the antibodies used in this study are  
21 enlisted in **S2 Table**.

22

23 **Caspase Assay:** Caspase-Glo® 1 or Caspase-Glo® 3/7 assay kits (Promega, G9951 and  
24 G8090) was used according to the manufacturer's instructions to measure Caspase-1 activity.  
25 In a 96 well plate, cell lysates with similar protein concentrations were added to each well,  
26 followed by the addition of 100uL of either Caspase-Glo 1 or Caspase-Glo 3/7 reagent and  
27 incubated at room temperature for 2h prior to luminescence detection in the VICTOR Nivo  
28 multimode reader.

29

30 **Enzyme-linked immunosorbent assay (ELISA):** ELISA for Human IL-1 beta (Invitrogen #  
31 88-7261), Il-18 (Invitrogen #BMS267-2) and DNA Damage (Invitrogen # EIADNAD) was done  
32 as per manufacturer's instruction. Readings were acquired in VICTOR Nivo multimode reader  
33 at 450 nm.

34

35 **PBMC's isolation:** 5 mL of peripheral blood was collected and carefully poured into the CPT  
36 cell preparation tube (BD Bioscience, # 362753) for isolation of PBMCs. The tubes were

37 centrifuged at 1600g for 15mins and the top 3/4th layer of plasma was discarded, while the  
 38 remaining 1/4th was gently mixed with the PBMC layer and transferred to a separate 15ml  
 39 tube. This tube was centrifuged for 5mins at 300g to pellet the PBMCs which were  
 40 subsequently washed once in RPMI media and pelleted. The cell pellet was resuspended in  
 41 1ml RPMI, and cell density was determined. Around  $2 \times 10^6$  cells were taken per condition for  
 42 the dengue-infected Huh7 culture supernatant challenge experiment.

43  
 44  
 45

**Table S1: Primers used in this study**

| <b>Gene specific primers</b> |                          |
|------------------------------|--------------------------|
| MFN1 R                       | TTGGAGAGCCGCTCATTACCT    |
| MFN2 F                       | GTGGAATACGCCAGTGAGAAGC   |
| MFN2 R                       | CAACTTGCTGGCACAGATGAGC   |
| PARK2 F                      | CCAGAGGAAAGTCACCTGCGAA   |
| PARK2 R                      | GTTCGAGCAGTGAGTCGCAATC   |
| PINK1 F                      | GTGGACCATCTGGTTCAACAGG   |
| PINK1 R                      | GCAGCCAAAATCTGCGATCACC   |
| DRP1 F                       | GCGAACCTTAGAATCTGTGGACC  |
| DRP1 R                       | CAGGCACAAATAAAGCAGGACGG  |
| Mff F                        | CCAAACGCTGACCTGGAAC      |
| Mff R                        | TTTCCTGCTACAACAATCCTCTCC |
| TOMM20 F                     | GAAGAGCAGAGCCTCAAAGGC    |
| TOMM20 R                     | GTTCTCCCATCCGTACCTCTTG   |
| GAPDH FP                     | GTCTCCTCTGACTTCAACAGCG   |
| GAPDH RP                     | ACCACCCTGTTGCTGTAGCCAA   |
| ASC FP                       | CGCGAGGGTCACAAACGT       |
| ASC RP                       | TGCTCATCCGTCAGGACCTT     |
| NLRP3 FP                     | GGACTGAAGCACCTGTTGTGCA   |
| NLRP3 RP                     | TCCTGAGTCTCCAAGGCATTC    |
| IL1B F                       | CCACAGACCTTCCAGGAGAATG   |
| IL1B R                       | GTGCAGTTCAGTGATCGTACAGG  |
| IL18R1 F                     | GGAGGCACAGACACCAAAGCT    |
| IL18R1 R                     | AGGCACACTACTGCCACCAAGA   |
| CASPASE1 FP                  | GGGTCGCTTTTGGGATTACCTG   |
| CASPASE1 RP                  | CAACTCCTTCATGGTCTCGTCC   |
| PHB1 F                       | GCGTGGTGAACCTCTGCCTTA    |
| PHB1 R                       | TGTACCCACGGGATGAGAAA     |
| BNIP3 F                      | GCTCCAGACACCACAAGAT      |
| BNIP3 R                      | TGAGAGTAGCTGTGCGCTTC     |
| Rubicon FP                   | CAGATTCTGCTGCCTCTTCC     |
| Rubicon RP                   | AGTGTCTGCCCTCTGAGAA      |
| UVRAG FP                     | ACAAACTGACGGAAAAGGAGAG   |

|                                        |                                                 |
|----------------------------------------|-------------------------------------------------|
| UVRAG RP                               | CCATGTTGATATCTTAGCTGTGC                         |
| GABARAB FP                             | GTAGCAACACGGTTCGTGAATA                          |
| GABARAB RP                             | AATCAGACGGAGGTGACTTGTT                          |
| LC3 A FP                               | TCCTGGACAAGACCAAGTTTTT                          |
| LC3 A RP                               | GTGAAAGGCTGGGAATCATTCT                          |
| LC3 B FP                               | TGGCCCTTAGTAATGCTTCTGT                          |
| LC3 B RP                               | TAGGTTGTGAAACTGACACCCA                          |
| LC3 C FP                               | GTAAGACACCACTGGACTTCCG                          |
| LC3 C RP                               | CCAAAATAAAACTGCCAAACGA                          |
| NDP52 FP                               | ACGCAAGGACTGGATTGGCATC                          |
| NDP52 RP                               | GGATTTCTGCTGTGTGGCTGA                           |
| OPA FP                                 | GCTGCTCCTCTAACAATGGCAC                          |
| OPA RP                                 | TCTCCAGGAGCAAACACTGCC                           |
| NIX FP                                 | CCTCGTCTCCATCCACAAT                             |
| NIX RP                                 | GTCCCTGCTGGTATGCATCT                            |
| OPTINEURIN FP                          | AGGTGGAGAGACTTGAAGTCGC                          |
| OPTINEURIN RP                          | TCCTCGCTGTCTGCTTCTCAGT                          |
| p62 FP                                 | TGTGTAGCGTCTGCGAGGGAAA                          |
| p62 RP                                 | AGTGTCCGTGTTTCACCTTCCG                          |
| <b>mt DNA specific PCR primers</b>     |                                                 |
| mt 16s rRNA FP                         | GCCTTCCCCCGTAAATGATA                            |
| mt 16s rRNA RP                         | TTATGCGATTACCGGGCTCT                            |
| ND2 FP                                 | AGCAGGCAGTTGAGGTGGAT                            |
| ND2 RP                                 | TTGGGCAAAAAGCCGGTTAG                            |
| ATP6 FP                                | GCCACAACCTAACCTCCTCGG                           |
| ATP6 RP                                | TAGGGTGGCGCTTCCAATTA                            |
| ND5 FP                                 | TTCATCCCTGTAGCATTGTTCCG                         |
| ND5 RP                                 | GTTGGAATAGGTTGTTAGCGGTA                         |
| <b>DENV specific primers and probe</b> |                                                 |
| DENV 1 FP                              | CATCAGCTATGGGCTACCTTG                           |
| DENV 1 RP                              | GAAGTCGTGGACAGGCATAAA                           |
| DENV 1 Probe                           | FAM-TGCACTATGCATGGAAGACAATGGC-BHQ               |
| <b>Cloning primers</b>                 |                                                 |
| BamHI <b>Capsid</b> FP                 | CGGGATCCATGAATAACCAACGGAAAAAGGCGAGAAACA<br>C    |
| EcoRI <b>Capsid</b> RP                 | GGAATTCTGCCATCACTGTAGGAATCAGCATGAT              |
| SacII <b>PrM</b> FP                    | TCCCCGCGGATGTTTCATTTGACCACACGCAACGGAGAA<br>CCAC |
| HindIII <b>PrM</b> RP                  | CCCAAGCTTTGTCATTGAGGGAGCGATGGCTGTCAG            |
| EcoRI <b>Env</b> FP                    | GGAATTCATGCGCTGCATAGGAATATCAAATAGGGAC           |
| XhoI <b>Env</b> RP                     | CCGCTCGAGGGCCTGCACCATAACTCCCAAGTATAGTG          |

47

48

49

50

51

**Table S2: List of reagents used in this study**

| <b>Reagents</b>           | <b>Source</b>                                                  | <b>Catalog #</b> |
|---------------------------|----------------------------------------------------------------|------------------|
| <b>Cell Lines</b>         |                                                                |                  |
| Huh-7                     | Kind gift from Dr. Aleem Siddiqui, UCSD                        | N/A              |
| Vero                      | ATCC                                                           | CCL-81           |
| THP-1                     | ATCC                                                           | TIB-202          |
| THP-ASC-GFP               | Invivogen                                                      | THP-ASC-GFP      |
| <b>Virus strain</b>       |                                                                |                  |
| Dengue-1 (WP 74)          | Kind gift from Dr. De Silva, University of North Carolina, USA | U88535           |
| Dengue-2 (P23085 INDI-60) | Kind gift from Dr. Manjula Kalia, RCB, Faridabad               | KJ918750         |
| DENV-3/USA/633798/1963    | NIV Pune                                                       | AFZ40124         |
| Dengue-4 (TVP-360 )       | Kind gift from Dr. De Silva, University of North Carolina, USA | KU513442         |
| <b>Antibodies</b>         |                                                                |                  |
| Goat anti-DENV-1          | Santa Cruz                                                     | SC325013         |
| Goat anti-DENV-2          | Santa Cruz                                                     | SC325014         |
| Goat anti-DENV-3          | Santa Cruz                                                     | SC325015         |
| Goat anti-DENV-4          | Santa Cruz                                                     | SC325021         |
| Mouse anti-COX-2          | Santa Cruz                                                     | SC514489         |
| Mouse anti-GAPDH          | Santa Cruz                                                     | SC25778          |
| Mouse anti-Nrf2           | Santa Cruz                                                     | SC365949         |
| Mouse anti-Optineurin     | Santa Cruz                                                     | SC166576         |
| Mouse anti-Tim23          | Santa Cruz                                                     | SC 514463        |
| Mouse anti-TOM20          | Santa Cruz                                                     | SC 17764         |
| Mouse anti-ASC            | Santa Cruz                                                     | SC514414         |
| Mouse anti-mtTFA(C-9)     | Santa Cruz                                                     | SC-376672        |
| Mouse anti-PARP1          | Santa Cruz                                                     | SC 8007          |
| Rabbit anti-Caspase-3     | Cell Signaling Technologies                                    | 9662S            |
| Rabbit anti-DRP 1         | Cell Signaling Technologies                                    | 8570S            |
| Rabbit anti-PDRP 1        | Cell Signaling Technologies                                    | 4494S            |
| Rabbit anti-HA            | Cell Signaling Technologies                                    | 3724 S           |
| Rabbit anti-IL-1 $\beta$  | Cell Signaling Technologies                                    | 12703S           |
| Rabbit anti-LAMP 1        | Cell Signaling Technologies                                    | 9091S            |
| Rabbit anti-MFN1          | Cell Signaling Technologies                                    | 14395            |
| Rabbit anti-MFN2          | Cell Signaling Technologies                                    | 11925S           |
| Rabbit anti-MFF           | Cell Signaling Technologies                                    | 84580S           |
| Rabbit anti-PMFF          | Cell Signaling Technologies                                    | 49281S           |
| Rabbit anti-NDP52         | Cell Signaling Technologies                                    | 9036             |
| Rabbit anti-NLRP3         | Cell Signaling Technologies                                    | 15101S           |
| Rabbit anti-OPA-1         | Cell Signaling Technologies                                    | 67589S           |
| Rabbit anti-PGC1 $\alpha$ | Cell Signaling Technologies                                    | 2178S            |
| Rabbit anti-PINK 1        | Cell Signaling Technologies                                    | 6946S            |

|                               |                             |           |
|-------------------------------|-----------------------------|-----------|
| Rabbit anti-TOM 20            | Cell Signaling Technologies | 42406S    |
| Rabbit anti-PINK1             | Cell Signaling Technologies | 6946      |
| Rabbit anti-VDAC              | Cell Signaling Technologies | 4661S     |
| Rabbit anti- $\beta$ -actin   | Cell Signaling Technologies | 4970      |
| Rabbit anti-CASPASE- 1        | Cell Signaling Technologies | 2225S     |
| Rabbit anti-COX-IV            | Cell Signaling Technologies | 4844S     |
| Rabbit anti-PPAR $\gamma$     | Cell Signaling Technologies | 2443      |
| Rabbit anti-LC3B              | Sigma-aldrich               | L7543     |
| Rabbit anti-Hsp60             | Bio-Bharati                 | BB-AB0209 |
| Rabbit anti-Dengue Virus PrM  | Gentex                      | GTX128092 |
| Rabbit anti- Dengue Virus NS3 | Gentex                      | GTX124252 |
| Rabbit anti-Parkin            | Abcam                       | ab15954   |
| Mouse anti-PINK1              | Abcam                       | ab75487   |
| Mouse anti-ds DNA             | Abcam                       | ab27156   |

52

53

54 **Supplementary Figure Legends:**

55 **Figure S1: (A)** Representative confocal images of Huh7 cells either mock-infected or infected  
56 with dengue serotype 1 for 24h, 48h, and 60h post-infection. Cells were immunostained for  
57 mitochondrial marker TOMM20 (green). The adjacent grayscale images represent the 2D  
58 trace of the tubular mitochondrial network obtained by the Skeletonize 2D/3D plugin of ImageJ.  
59 **(B)** Graph depicting the quantification of the % of cells displaying highly elongated  
60 mitochondria in mock- and dengue-infected cells at indicated time post-infection. **(C)** Bar graph  
61 depicting the mitochondrial superoxide levels in mock- and dengue-infected Huh7 cells 48h  
62 post-infection. H<sub>2</sub>O<sub>2</sub> was used as a positive control to induce mitochondrial superoxide levels.  
63 Statistical analysis was done using one-way ANOVA \*\*\*P < 0.001, \*\*\*\*P < 0.0001.

64 **Figure S2: Dengue infection induces mitochondrial damage in A549 and HEK cells**

65 Confocal microscopy images of A549 **(A)** and HEK cells **(B)** infected with dengue-2 serotype  
66 at indicated time points. The cells were immunostained with dengue-2 serotype-specific anti-  
67 envelope, and mitochondria-specific anti-TOMM20 antibodies. Nuclei were counterstained  
68 with DAPI. Scale bar shown is 10 $\mu$ m. Around 30-40 cells per condition were quantified for the  
69 various features of the mitochondria such as number, length, and circularity. The quantification  
70 is depicted as % of mock for average mitochondrial number per cell, mitochondrial footprint,  
71 and circularity **(A-B)**. Bar graph depicting the mitochondrial superoxide levels in mock- and  
72 dengue-2 infected A549 **(C)** and HEK cells **(D)** cells 48h post-infection. H<sub>2</sub>O<sub>2</sub> was used as a  
73 positive control to induce mitochondrial superoxide levels. Data presented is the mean  $\pm$  SEM  
74 of three independent experiments. Statistical analysis was done using one way ANOVA (B-  
75 D,G) or two-way ANOVA (F). \*P < 0.05, \*\*P < 0.01, \*\*\*P < 0.001, \*\*\*\*P < 0.0001.

76

77 **Figure S3: Dengue perturbs mitochondrial fission and fusion machinery.**

78 **(A)** Western blot analysis of the indicated mitochondrial fission proteins in Huh7 cells either  
79 mock-infected or infected with respective dengue serotypes for 24h, 48h and 60h post-  
80 infection. NS3 is used as an infection marker and actin as the internal loading control. The bar  
81 graphs depict densitometry analysis of bands from three Western blots for the respective  
82 proteins. **(B)** Western blot analysis of the indicated mitochondrial fusion proteins in Huh7 cells  
83 either mock-infected or infected with respective dengue serotypes for 24h, 48h and 60h post-  
84 infection. PrM is used as an infection marker and actin as the internal loading control. The bar  
85 graphs depict densitometry analysis of bands from three Western blots for the respective  
86 proteins. **(C)** Heatmap representing the transcript level of the indicated mitochondria fission  
87 and fusion genes in Huh7 cells infected with various dengue serotypes for indicated time post  
88 infection. Data are mean  $\pm$  SEM from three independent experiments. Statistical analysis was  
89 done using one-way ANOVA. ns = non-significant, \*P < 0.05, \*\*P < 0.01.

90

91 **Figure S4: Dengue infection inhibits mitophagy**

92 **(A)** Huh7 cells transfected with the mitophagy reporter p-mito-mRFP-EGFP were treated with  
93 CCCP, 40h post-transfection and stained with the lysosome marker LAMP1. Representative  
94 confocal image of cells harbouring the mitophagy reporter. White arrows in the zoomed inset  
95 depict colocalization between lysosomes (LAMP1 positive) and only red mitochondria  
96 (mitochondria delivered to lysosomes). **(B)** Confocal images of Huh7 cells either mock-  
97 infected or infected with respective serotypes of dengue for 48h and stained with lysosome  
98 and mitochondrial markers LAMP1 (green) and TOMM20 (red). Dengue envelope (cyan) is  
99 used as a marker of infection. **(C)** Confocal images of Huh7 cells either mock-infected or  
100 infected with respective serotypes of dengue for 48h and further treated with CCCP to induce  
101 mitophagy. Fixed cells were stained with lysosome and mitochondrial markers LAMP1 (green)  
102 and TOMM20 (red). Dengue envelope (cyan) is used as a marker of infection. Pixel-density  
103 images in the right represent the colocalized spots between mitochondria-lysosomes obtained  
104 by the merge of red and green channels. **(D)** Confocal images of Huh7 cells either mock-  
105 infected or infected with dengue1 for 48h. Fixed cells were stained with LC3B (green) and  
106 mitochondrial markers TOMM20 (red). Zoomed inset show regions of colocalization between  
107 the green and red channels represented by yellow spots.

108 **Figure S5: (A)** Densitometry analysis of bands representing the proteins shown in figure 2F  
109 from three independent Western blots. **(B)** Western blot analysis of the indicated mitochondrial

110 proteins in mock- and dengue-infected Huh7 cells, 40h post-infection untreated or treated with  
111 125nm of bafilomycin-A for 8h to inhibit lysosomal degradation. NS3 was used as an infection  
112 marker and actin as an internal loading control. Statistical significance was determined using  
113 one-way ANOVA. Only significant variations are indicated in the graph. \*P < 0.05.

114

#### 115 **Figure S6: Protease protection assay**

116 To check the status of mitophagosome formation in dengue infected Huh7 cells we performed  
117 the mitophagosome protease protection assay. **(A)** Schematic representation of the protease  
118 (proteinase K) protection assay. Mitochondria engulfed in the phagosomes (mitophagosome)  
119 are protected from proteinase K treatment and treatment with the detergent triton x100  
120 (TX100) leads to proteinase K sensitivity due to membrane lysis **(B)**. Western blot analysis of  
121 the mitochondrial proteins TOMM20, OPA1, and HSP60 in the crude cytosol fractions obtained  
122 from mock, CCCP-treated, and dengue infected Huh7 cells subjected to the indicated  
123 treatments.

124

#### 125 **Figure: S7: Effect of individual dengue virus protein on mitophagy flux**

126 **(A)** Huh7 cells were co-transfected with the mitophagy reporter p-mito-mRFP-EGFP and  
127 respective pCMV3Tag3A vectors expressing the individual dengue virus proteins to determine  
128 the effect of their ectopic expression on the status of mitophagy flux. Representative confocal  
129 images of cells co-expressing the respective dengue virus proteins (anti-HA antibody) and  
130 mitophagy reporter. **(B)** Quantification of the average number of red mitochondria per cell in  
131 cells harbouring the respective dengue protein and mitophagy reporter. **(C)** Western blot  
132 analysis depicting the expression level of each individual dengue viral protein detected by anti-  
133 HA and anti-FLAG antibodies in cell lysates obtained from Huh7 cells transfected with the  
134 respective expression vectors. Data are mean  $\pm$  SEM of three independent experiments.  
135 Statistical analysis was done using one-way ANOVA. ns = non-significant, \*P < 0.05, \*\*\*\*P <  
136 0.0001.

137

138 **Figure S8: (A)** Densitometry analysis of cleaved PINK1 (p44 band), and total PINK1 (p44 +  
139 p64), Parkin, NDP52 and optineurin bands to indicate their relative expression status in  
140 respective conditions. **(B)** Western blot analysis of PINK1 and Parkin in the purified  
141 mitochondrial and cytosol fractions obtained from mock-infected or dengue serotype 1 or 2  
142 infected Huh7 cells at 24h and 48h post-infection. CCCP treated Huh7 cells fractions were



143 used as a positive control for PINK1 and Parkin translocation to mitochondria. VDAC and  
144 GAPDH were used as markers to indicate the purity of the mitochondrial and cytosol fractions.  
145 Statistical significance was determined using one-way ANOVA. Only significant variations are  
146 indicated in the graph. \*P < 0.05, \*\*P < 0.01, \*\*\*P < 0.001

147

148 **Figure S9:** Western blot **(A)** and transcript **(B)** analysis of BNIP3, BNIP3L/Nix, and Prohibitin  
149 in Huh7 cells either mock-infected or infected with respective dengue serotypes for 24h, 48h  
150 and 60h post-infection. NS3 is used as an infection marker and actin as the internal loading  
151 control. Western blot analysis of PINK1 & Parkin **(C)** and NDP52 & optineurin **(D)** in Huh7 cells  
152 either mock-infected or infected with various dengue serotypes for 40h followed by no  
153 treatment or treatment with 125nm of bafilomycin-A for 8h to inhibit lysosomal degradation.  
154 PrM and NS4B were respectively used as an infection marker and actin as an internal loading  
155 control

156

157 **Figure S10: (A)** Densitometry analysis of bands representing the proteins shown in figure 5C  
158 from three independent Western blots. **(B)** Heat map representing the transcript levels of  
159 PGC1 $\alpha$  and NRF2 in Huh7 cells infected with respective serotypes of dengue at indicated time  
160 points post-infection in comparison to mock-infected cells. **(C)** Densitometry analysis of bands  
161 representing cleaved PARP-1 (A), caspase 3 p17 band (B) and Caspase1 p20 band (C) from  
162 three independent Western blots as shown in Figures 6C & 6E. Statistical significance was  
163 determined using one-way ANOVA. ns= non-significant, \*P < 0.05. Statistical significance was  
164 determined using one-way ANOVA. Only significant variations are indicated in the graph. \*P  
165 < 0.05, \*\*P < 0.01, \*\*\*P < 0.001

166

167 **Figure S11: Dengue virus infection leads to mt-DNA release in A549 and HEK cells**

168 mtDNA isolated from the cytosol fractions **(A)** and pre-clarifed cell culture medium **(B)** of the  
169 DENV-2 infected A549 cells was subjected to qRT-PCR. Bar graph depicting the relative levels  
170 (fold change with respect to mock) of ATP6 and mt-16S RNA. mtDNA isolated from the cytosol  
171 fractions **(C)** and pre-clarifed cell culture medium **(D)** of the DENV-2 infected HEK cells was  
172 subjected to qRT-PCR. Bar graph depicting the relative levels (fold change with respect to  
173 mock) of ATP6 and mt-16S RNA. Data are mean  $\pm$  SEM of three independent experiments.  
174 Statistical significance was determined using one way ANOVA. ns= non-significant, \*P < 0.05,  
175 \*\*P < 0.01, \*\*\*P < 0.001, \*\*\*\*P < 0.0001.

176

177 **Figure S12:**

178 Human PBMCs were challenged for 8h with clarified culture supernatants obtained from  
179 dengue serotype 1 infected (D1) Huh7 cells at 48h and 60h post-infection. Challenge with  
180 culture-supernatant from mock-infected Huh7 cells, LPS+Nigericin, and direct infection with  
181 dengue virus 1 were used as negative, positive, and infection control. **(A)** The graph depicts  
182 relative fold change in the transcript level of IL-1 $\beta$ , IL-18 and caspase-1 in PBMCs challenged  
183 with indicated conditions with respect to untreated PBMCs. **(B)** The graph depicts relative fold  
184 change in the transcript level of IL-1 $\beta$ , IL-18 and caspase-1 in monocytes challenged with  
185 clarified culture supernatants obtained from dengue serotype 1 infected (D1) Huh7 cells at  
186 48h or similar culture supernatants pre-treated with DNase 1 (160U/ml, 37°C for 30 mins). **(C)**  
187 Bar graph depicting the quantification of the number of ASC-GFP puncta/specks per cell, 8h  
188 post-challenge of ASC-GFP THP1 cells with indicated treatments. **(D)** mt-DNA isolated from  
189 the plasma of dengue patients (n=10) collected at the acute and convalescent phase and age-  
190 matched healthy controls (n=9) was subjected to DNA damage ELISA. The graph depicts the  
191 relative quantity of 8-OHdG levels (ng/mL) in the indicated group of samples. Data are mean  
192  $\pm$  SEM from three independent experiments. Statistical significance was determined using  
193 one-way ANOVA. ns= non-significant, \*P < 0.05; \*\*P < 0.01; \*\*\*P < 0.001, \*\*\*\*P < 0.0001.

194

195

196

A

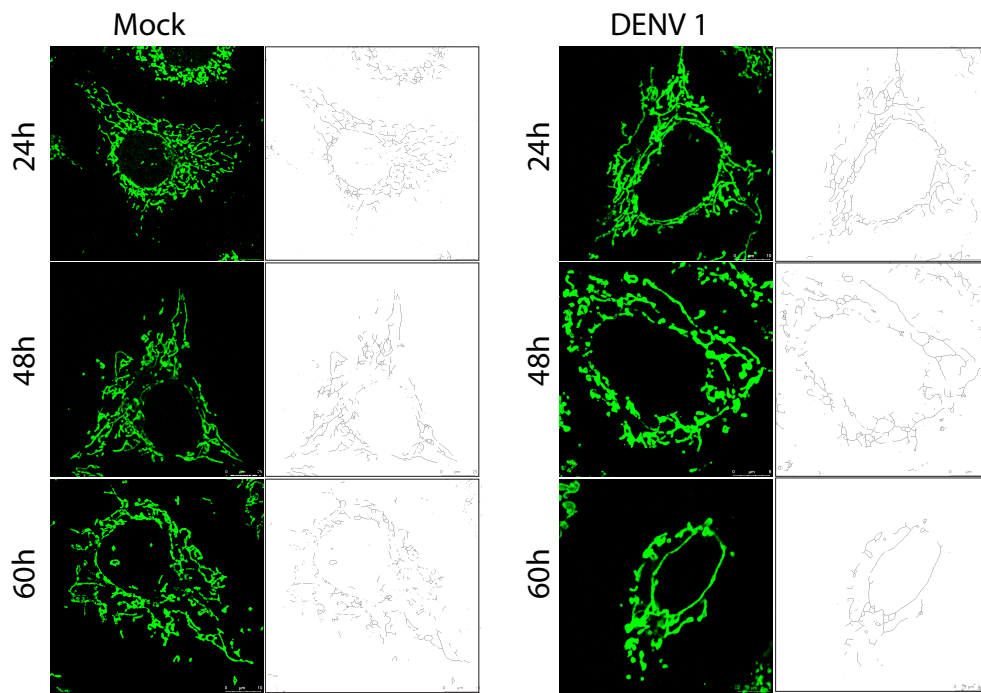

B

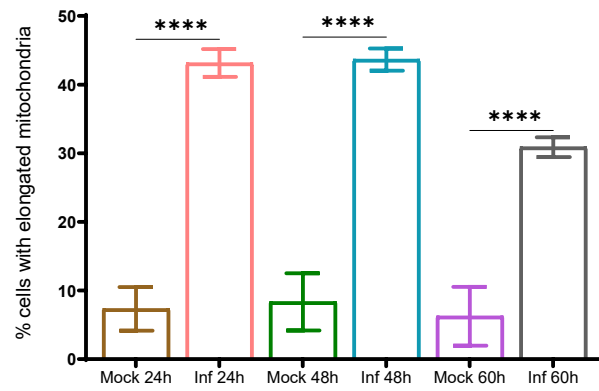

C

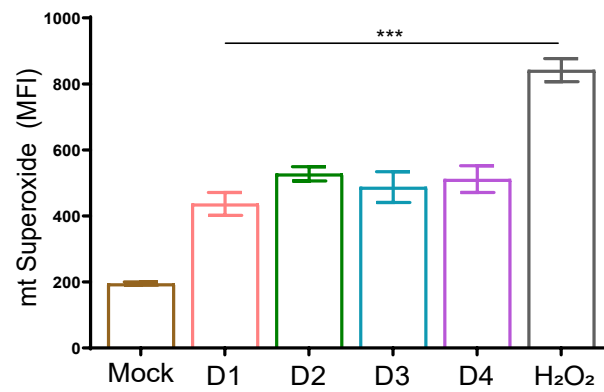

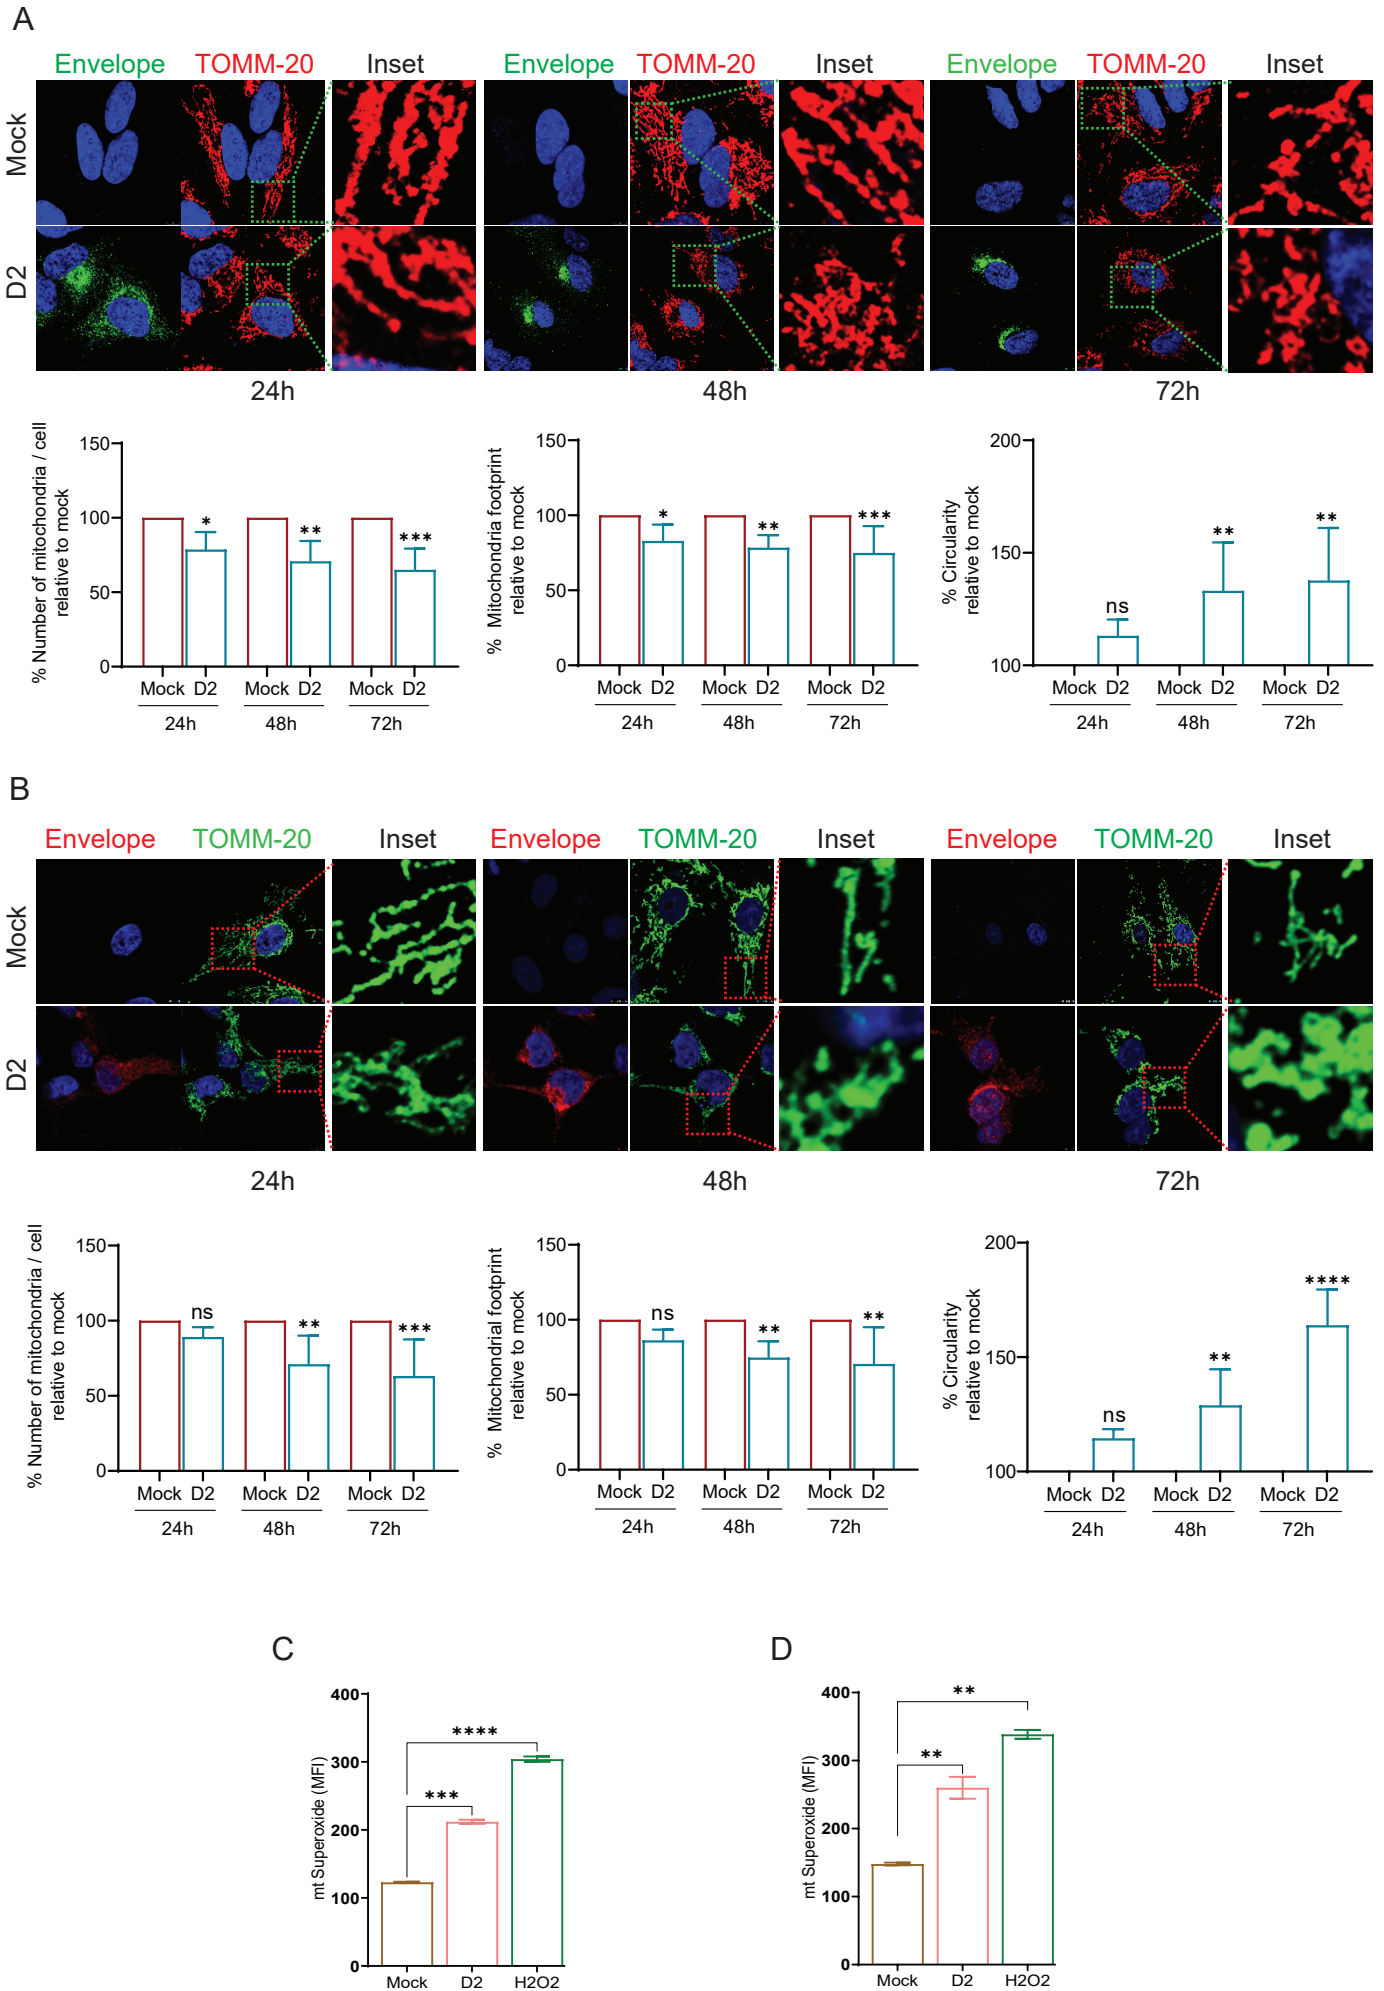

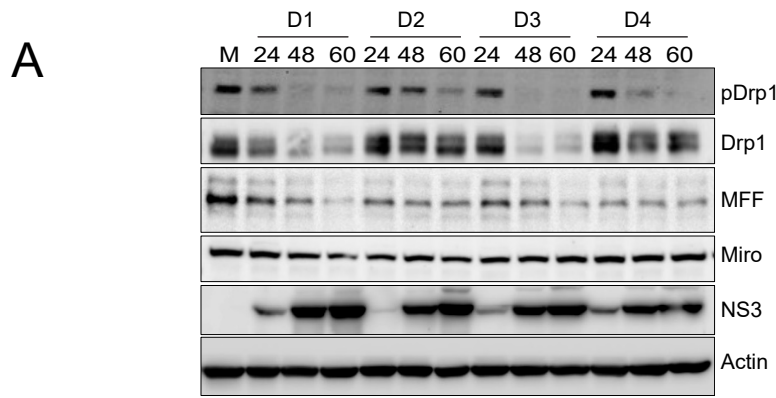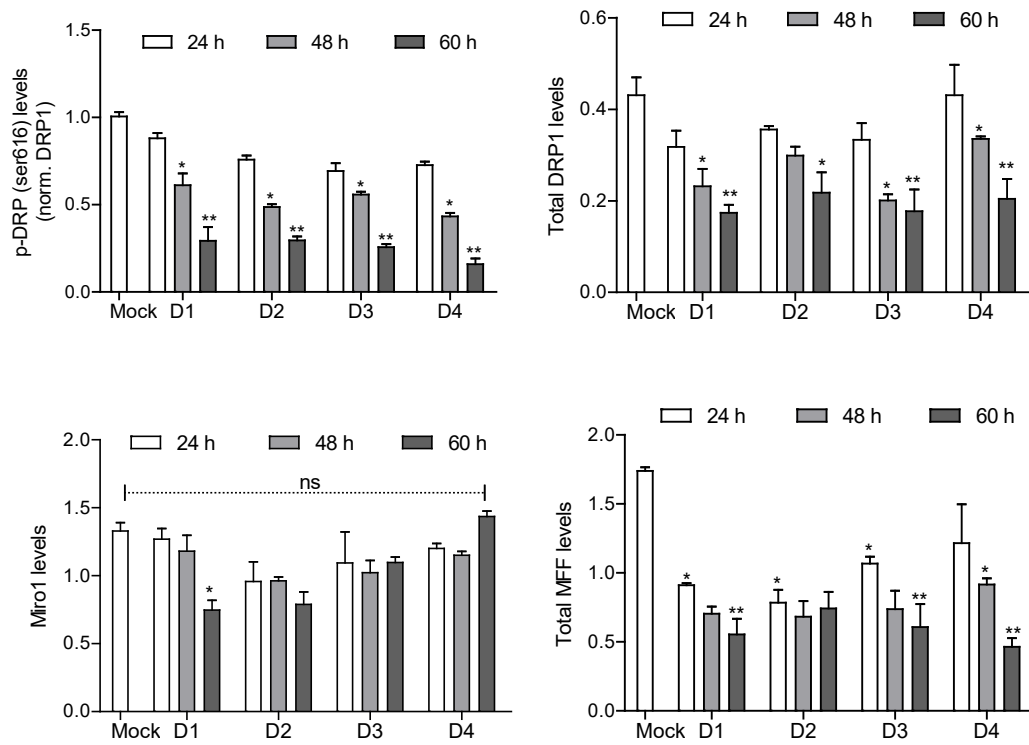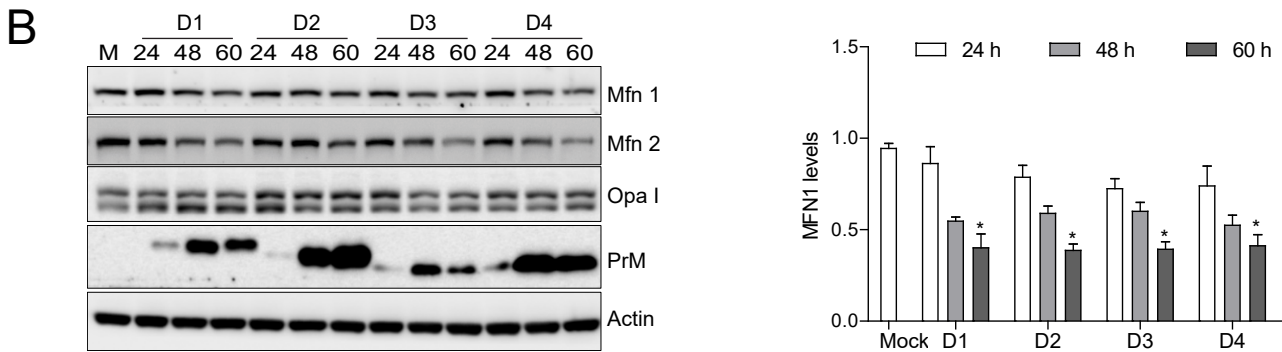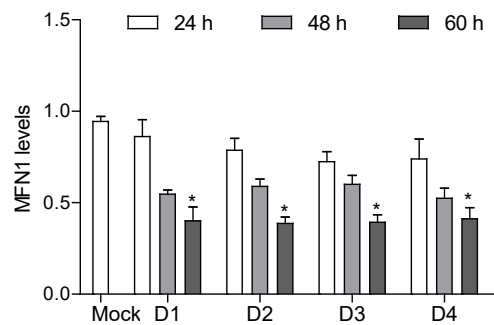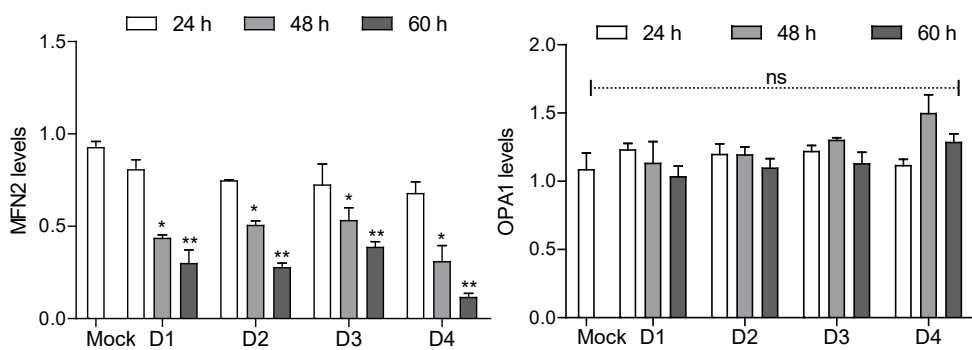

**C**

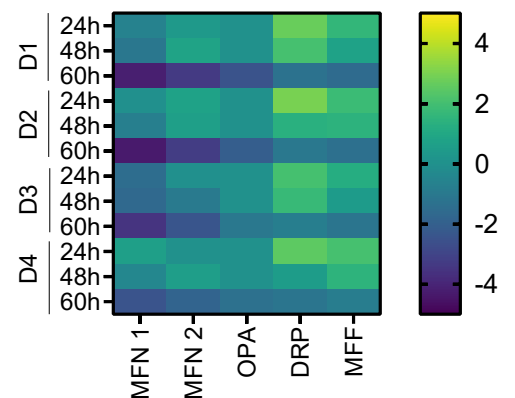

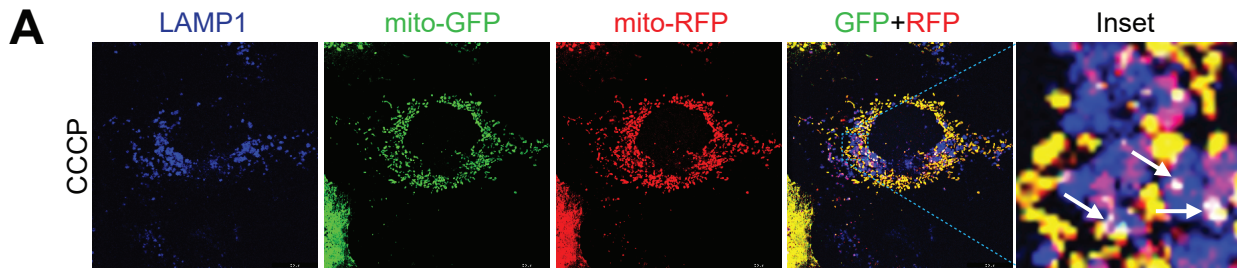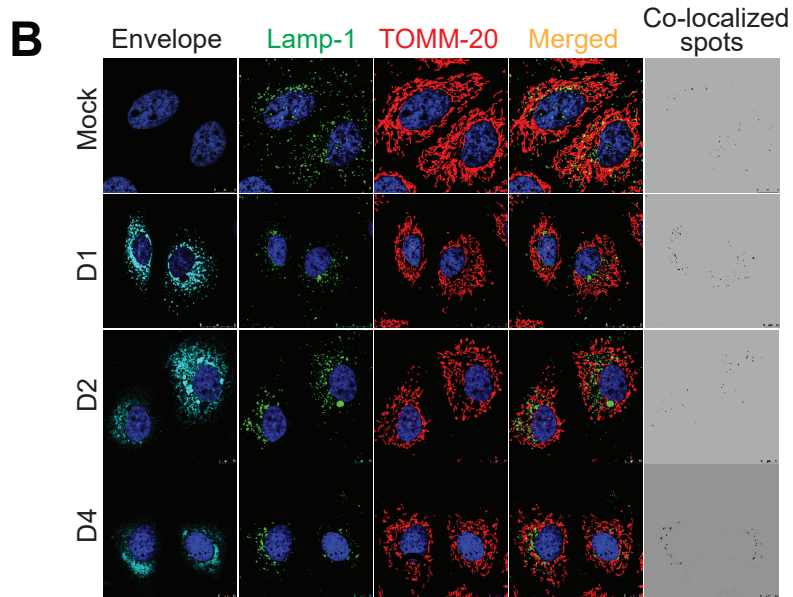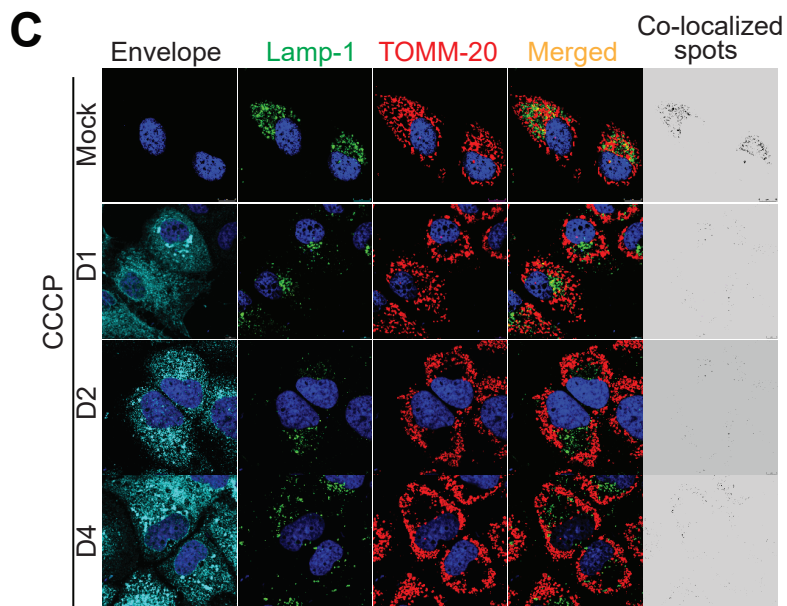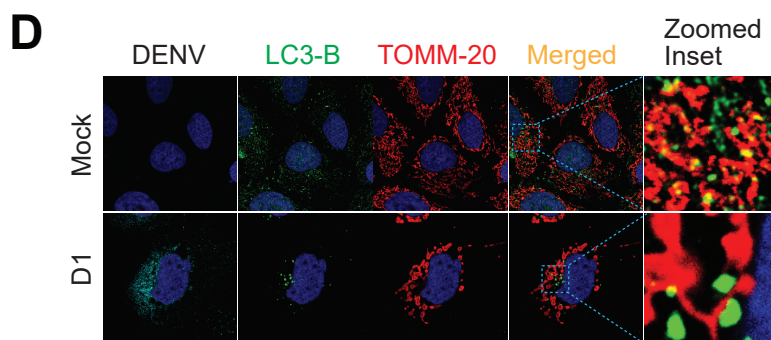



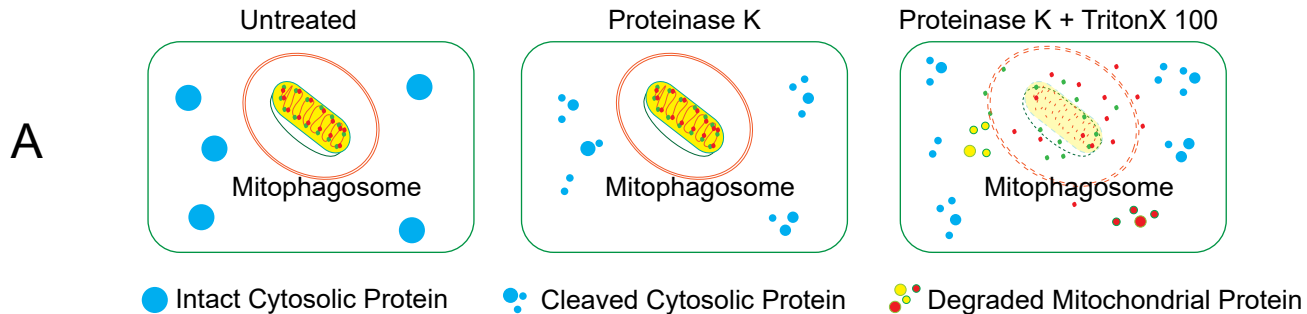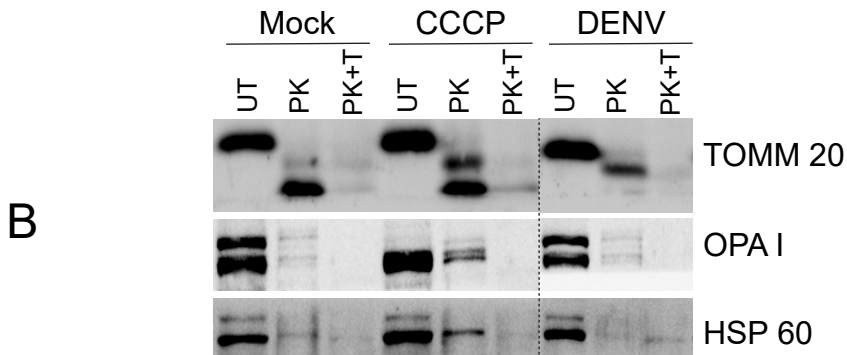



S7 Fig

A

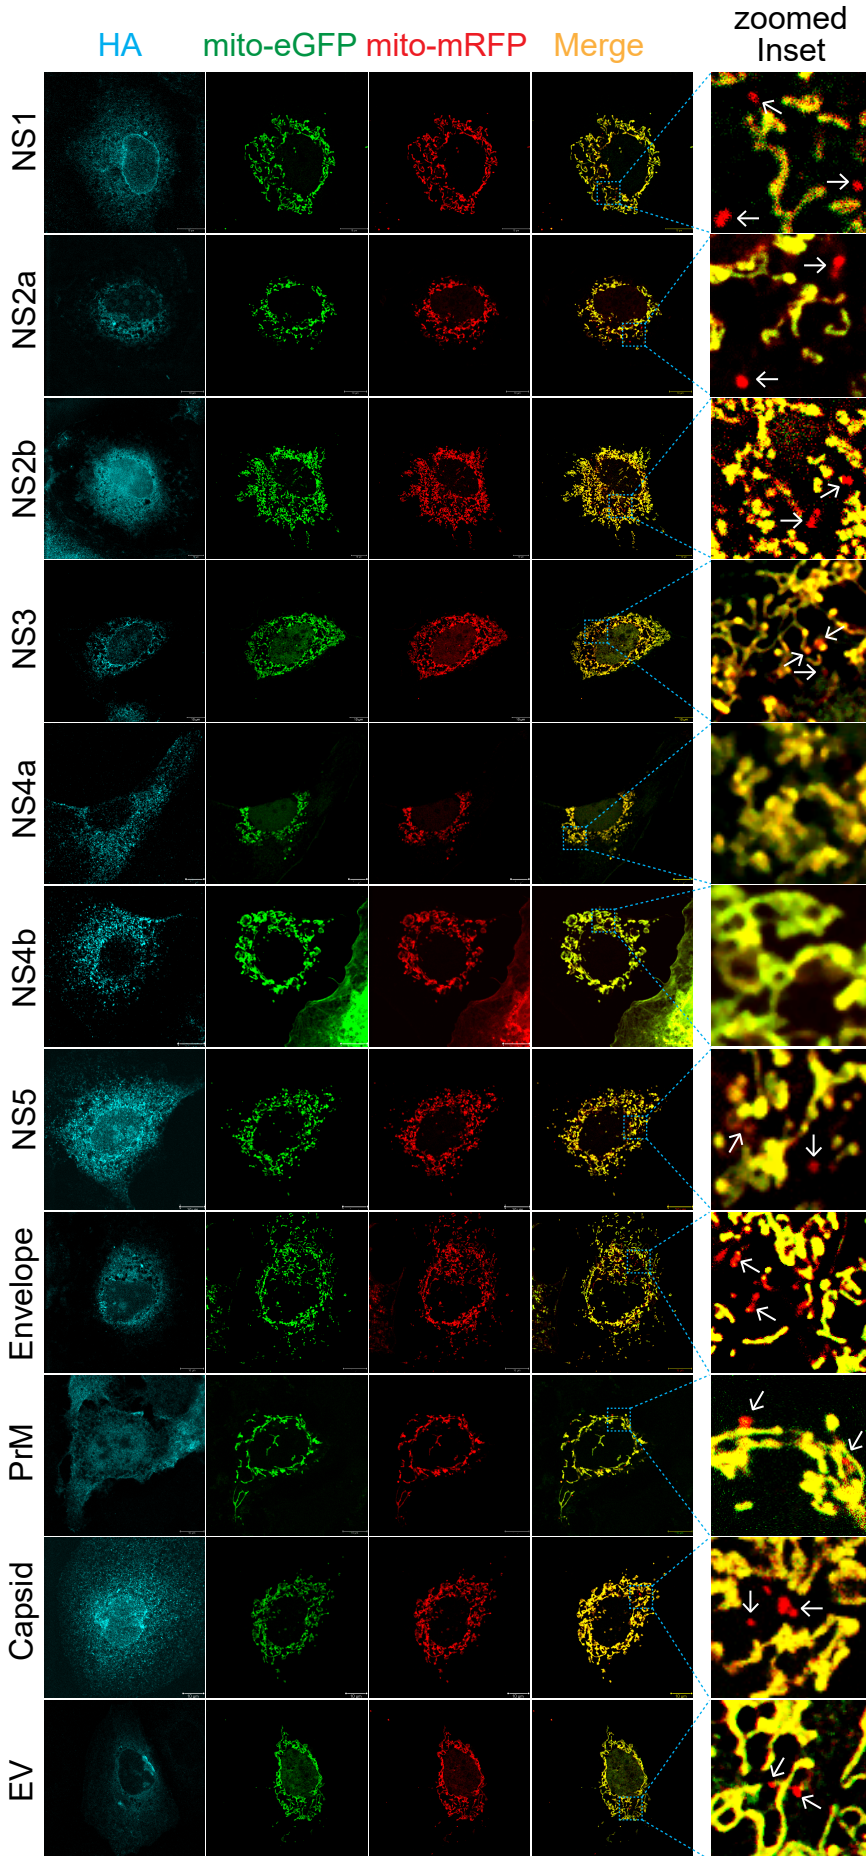

B

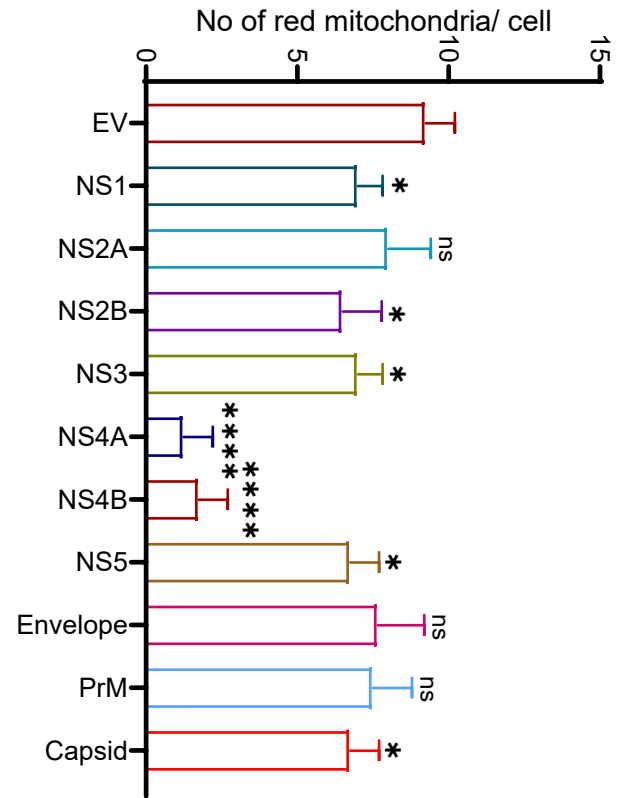

C

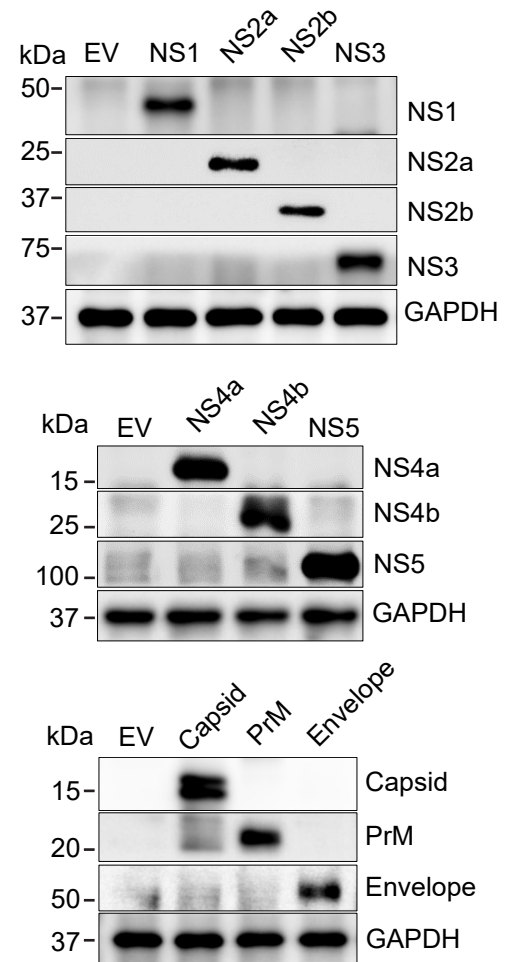

**A**

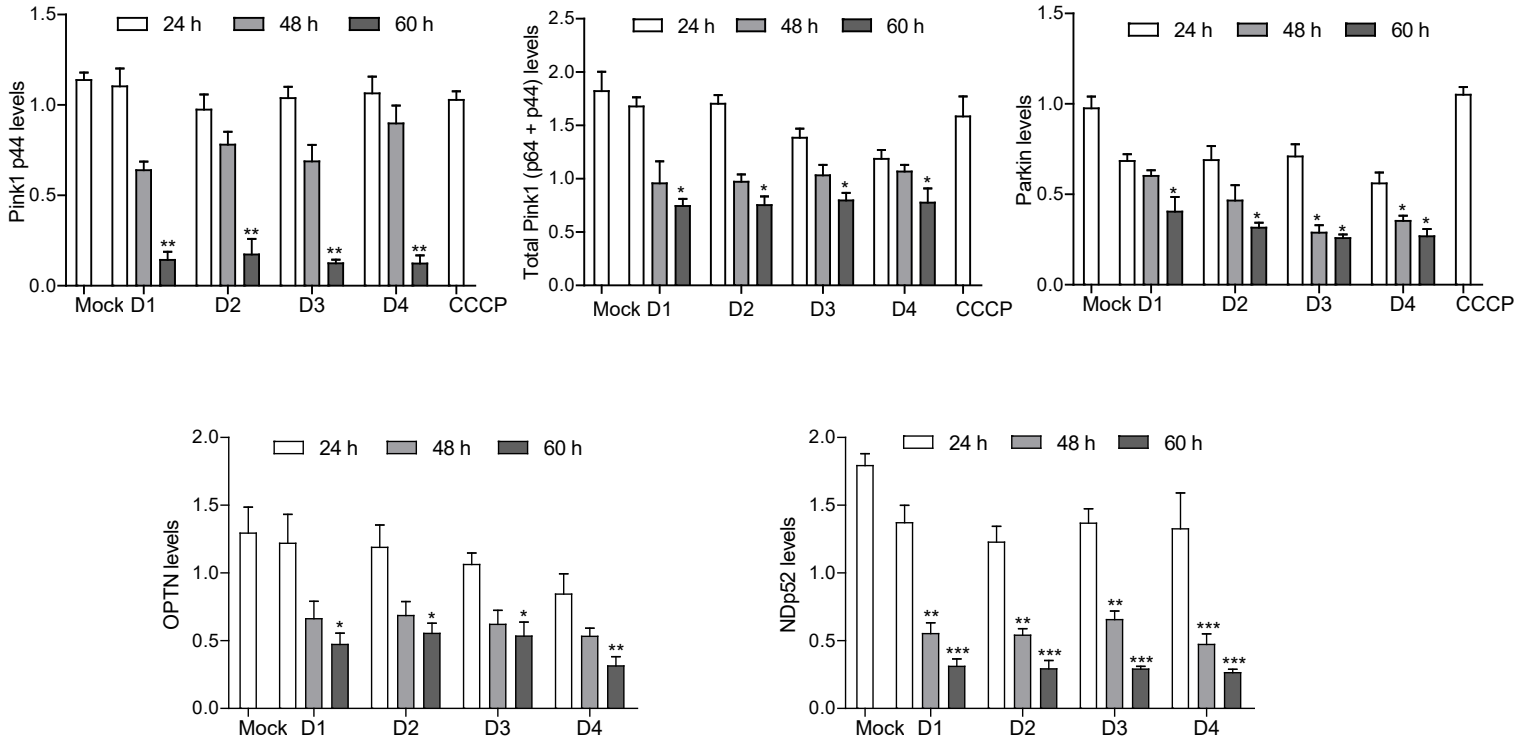

**B**

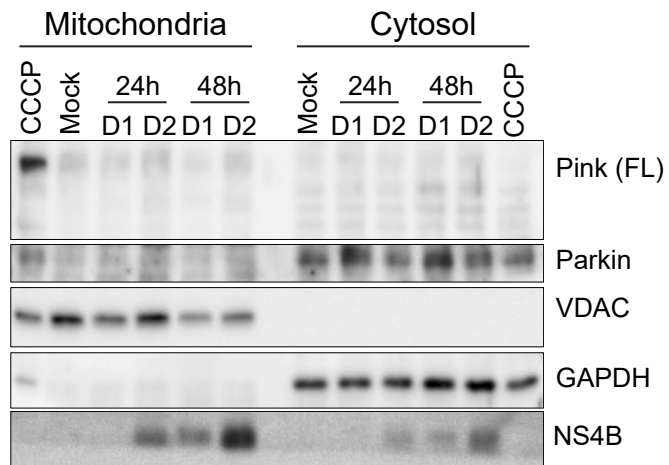

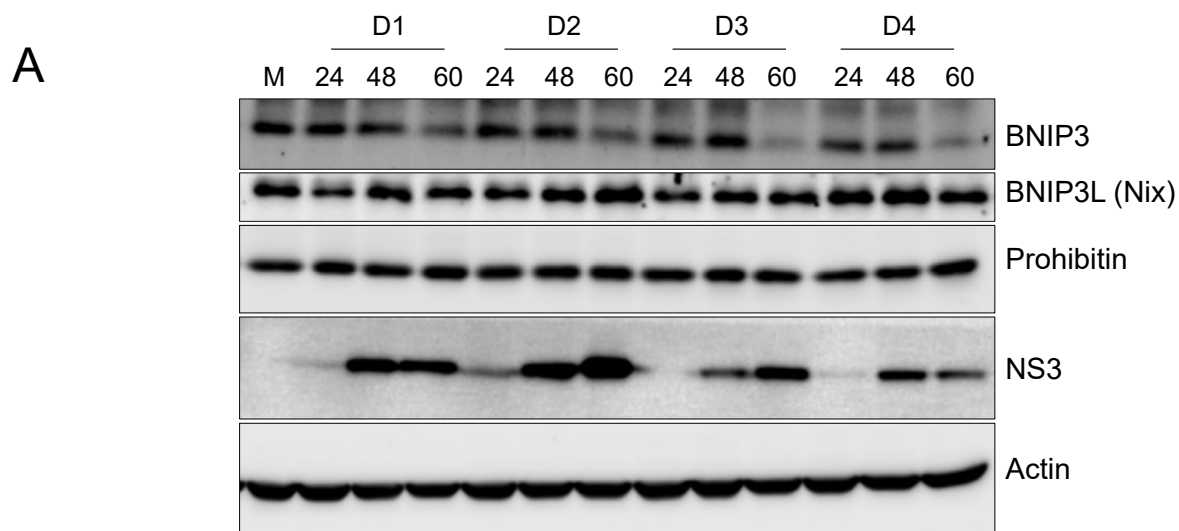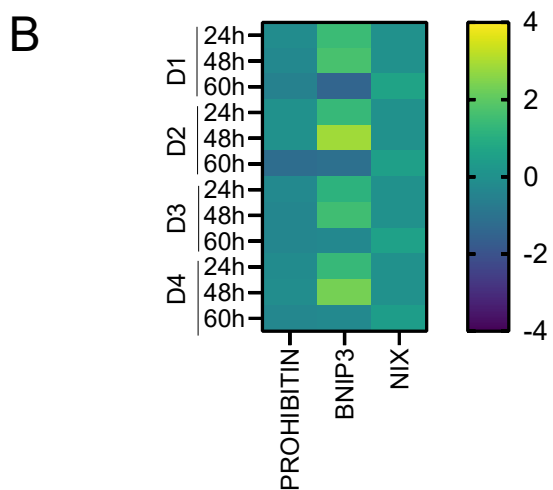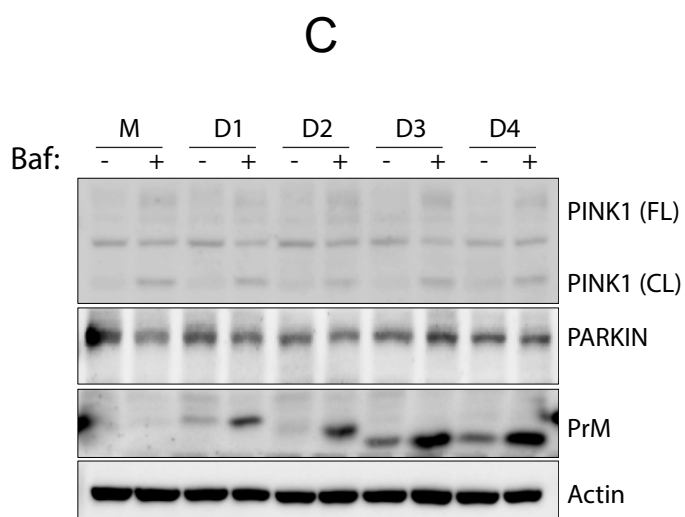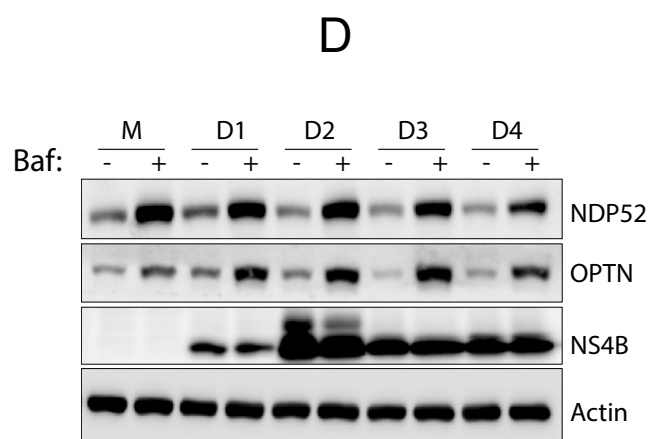

A

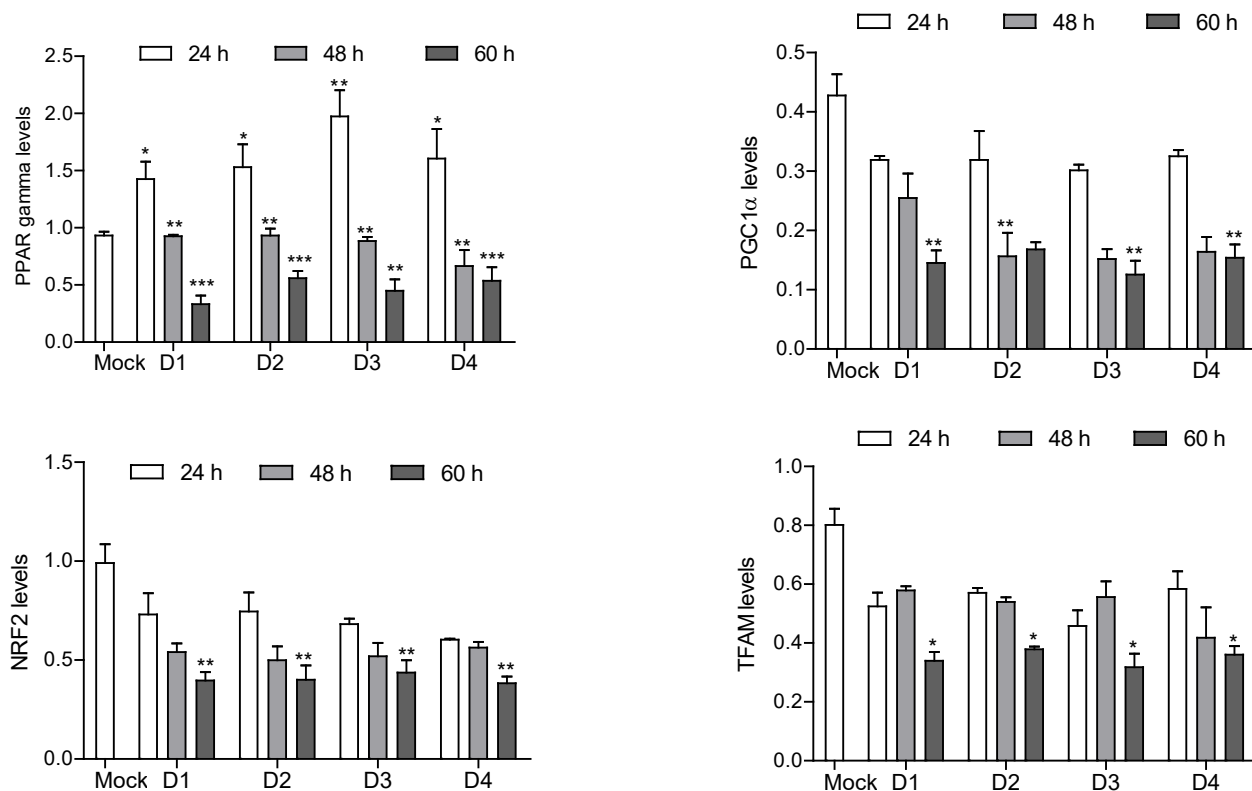

B

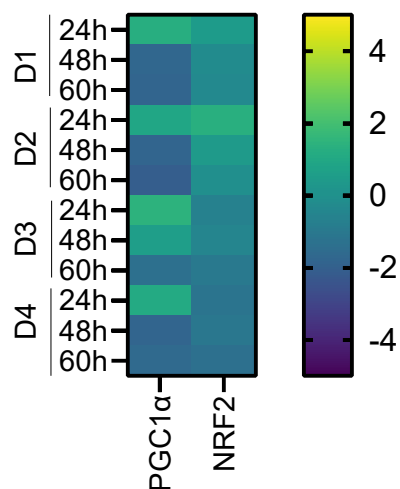

C

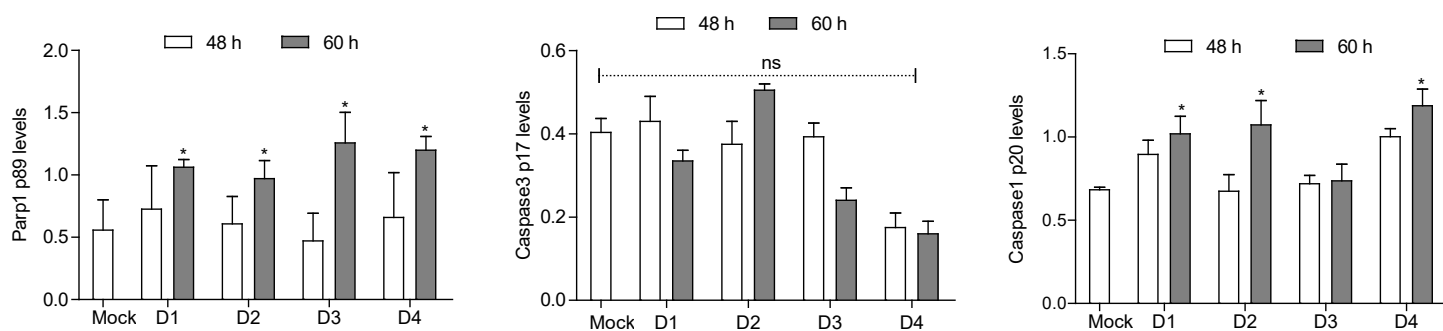

A

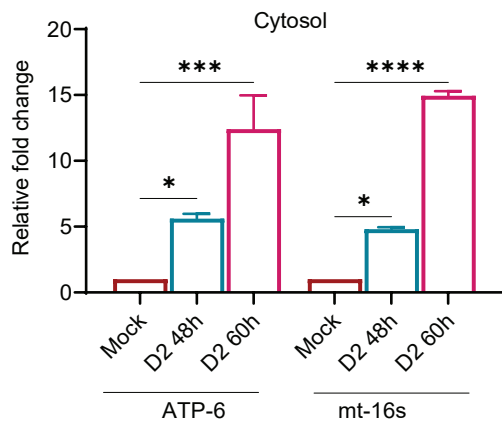

B

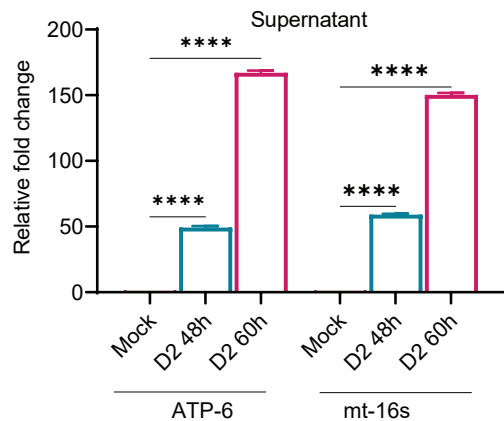

C

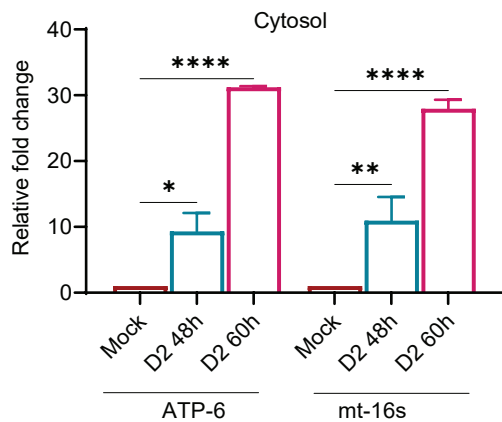

D

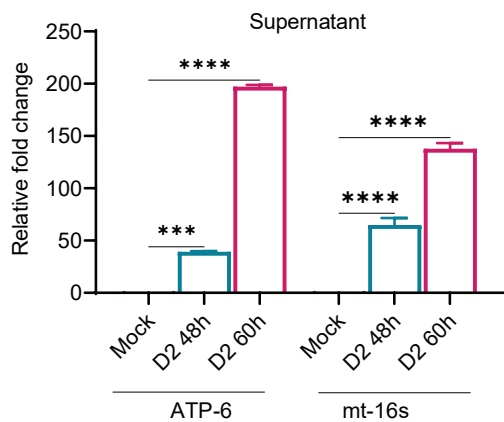

A

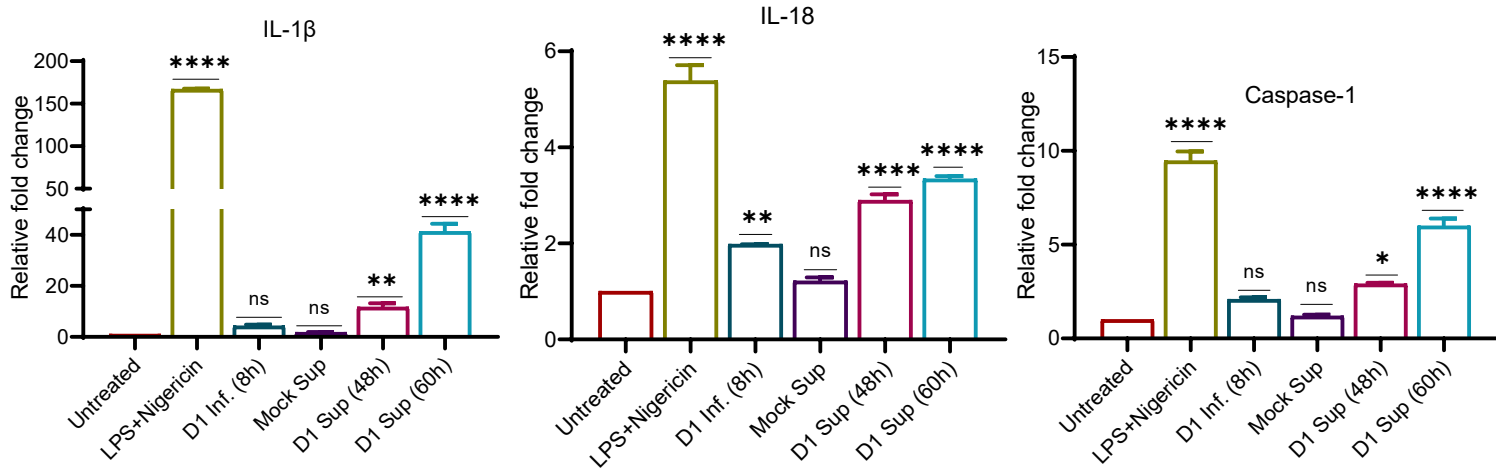

B

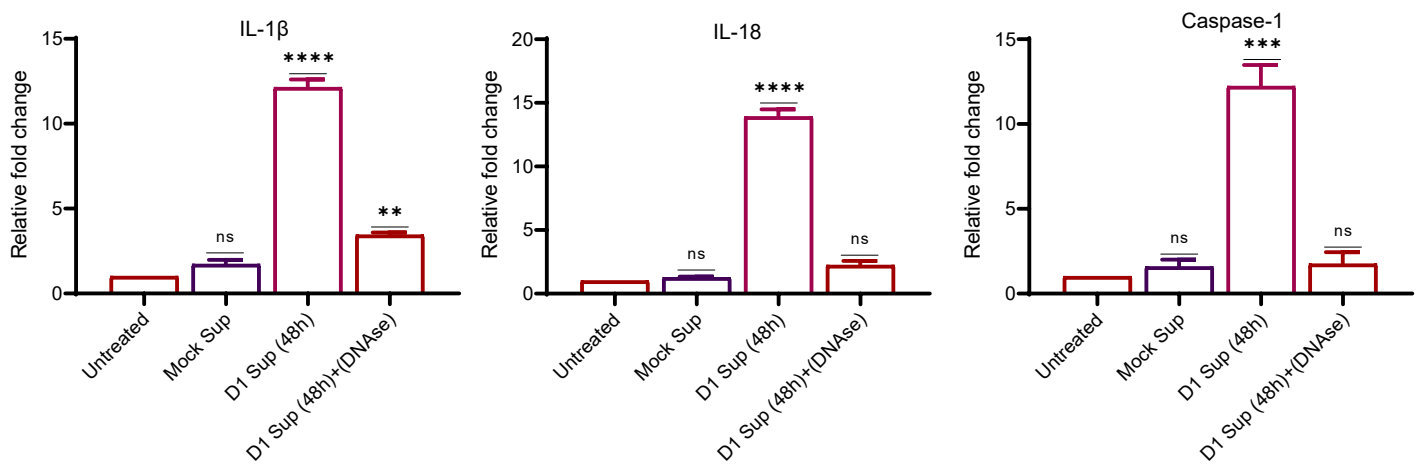

C

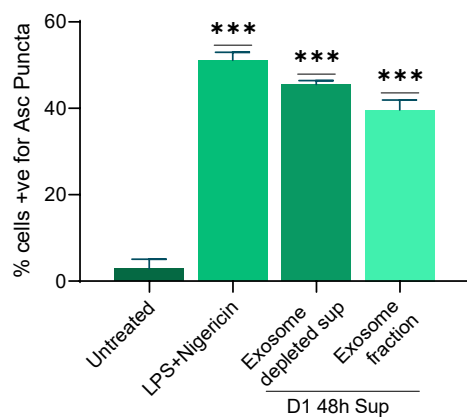

D

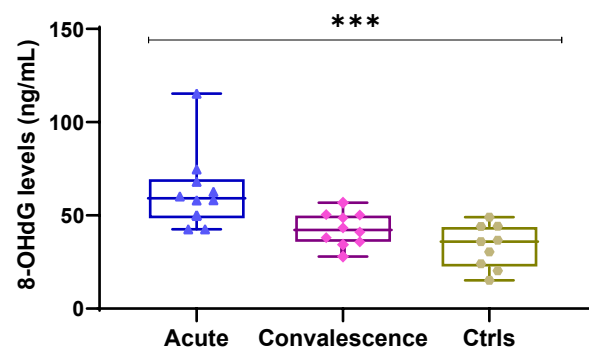

Supplement: jvi.00828-22-s0001.pdf [file jvi.00828-22-s0001.pdf]
